# Supplementary material for: Identification of a Gene-Related Risk Signature in Melanoma Patients Using Bioinformatic Profiling
Source: Hindawi journal article supplement (doi:10.1155/2020/7526204), 2020-04-29
Supplement: f1 [file 7526204.f1.pdf]

Supplementary Table 1. The characteristics of patients from the GEO database.

| Variable                | No. of<br>Patients<br>(n=122) | %    |
|-------------------------|-------------------------------|------|
| Age at diagnosis, years |                               |      |
| Mean                    |                               | 66.4 |
| SD                      |                               | 15.5 |
| Sex                     |                               |      |
| Male                    | 84                            | 68.9 |
| Female                  | 38                            | 31.1 |
| Stage                   |                               |      |
| Primary                 | 37                            | 30.3 |
| Metastatic              | 85                            | 69.7 |
| BRAF status             |                               |      |
| Mutation                | 31                            | 25.4 |
| WT                      | 91                            | 74.6 |
| NRAS status             |                               |      |
| Mutation                | 27                            | 22.1 |
| WT                      | 95                            | 77.9 |
| Overall survival, years |                               |      |
| Mean                    |                               | 3.8  |
| SD                      |                               | 4.1  |

Abbreviations: GEO, Gene Expression Omnibus. HR, hazard ratio. SD, Standard Deviation. WT, wild-type.

Supplementary Table 2. The characteristics of patients from the TCGA database.

| Variable                | No. of<br>Patients<br>(n=459) | %    |
|-------------------------|-------------------------------|------|
| Age at diagnosis, years |                               |      |
| Mean                    | 58.0                          |      |
| SD                      | 15.9                          |      |
| Sex                     |                               |      |
| Male                    | 284                           | 61.9 |
| Female                  | 175                           | 38.1 |
| AJCC stage              |                               |      |
| < III                   | 249                           | 54.2 |
| III                     | 185                           | 40.3 |
| IV                      | 25                            | 5.4  |
| BRAF status             |                               |      |
| Mutation                | 199                           | 43.4 |
| WT                      | 260                           | 56.6 |
| NRAS status             |                               |      |
| Mutation                | 127                           | 27.7 |
| WT                      | 332                           | 72.3 |
| Overall survival, years |                               |      |
| Mean                    | 5.0                           |      |
| SD                      | 5.3                           |      |

Abbreviations: TCGA, The Cancer Genome Atlas. SD, Standard Deviation. AJCC, American Joint Committee on Cancer, 7th Edition. WT, wild-type.

Supplementary Table 3. Comparison of clinicopathologic characteristics between primary and metastatic melanoma in GEO database.

| Variable                | Primary                |      | Metastatic             |      |
|-------------------------|------------------------|------|------------------------|------|
|                         | No. of Patients (n=37) | %    | No. of Patients (n=85) | %    |
| Age at diagnosis, years |                        |      |                        |      |
| Mean                    | 75.1                   |      | 62.8                   |      |
| SD                      | 14.3                   |      | 14.8                   |      |
| Sex                     |                        |      |                        |      |
| Male                    | 26                     | 70.3 | 58                     | 68.2 |
| Female                  | 11                     | 29.7 | 27                     | 31.8 |
| BRAF Mutation           |                        |      |                        |      |
| Mutation                | 8                      | 21.6 | 23                     | 27.1 |
| WT                      | 29                     | 78.4 | 62                     | 72.9 |
| NRAS Mutation           |                        |      |                        |      |
| Mutation                | 7                      | 18.9 | 20                     | 23.5 |
| WT                      | 30                     | 81.1 | 65                     | 76.5 |
| Overall survival, years |                        |      |                        |      |
| Mean                    | 2.1                    |      | 4.5                    |      |
| SD                      | 1.5                    |      | 4.7                    |      |

Abbreviations: GEO, Gene Expression Omnibus. SD, Standard Deviation. WT, wild-type.

Supplementary Table 4. Biological processes enriched in metastatic group.

| <b>Biological process</b>              | <b>Size</b> | <b>NES</b> | <b>FDR</b> |
|----------------------------------------|-------------|------------|------------|
| Telomere maintenance                   | 21          | 2.3817     | 0.0010     |
| Telomeric DNA binding                  | 26          | 2.2989     | 0.0021     |
| RNA-dependent-DNA biosynthetic process | 17          | 2.2243     | 0.0034     |
| Regulation of endopeptidase activity   | 87          | 2.1546     | 0.0012     |
| Regulation of DNA replication          | 50          | 2.1081     | 0.0198     |
| Ribosomal large subunit assembly       | 19          | 2.1053     | 0.0170     |
| Ribosomal subunit                      | 150         | 2.0568     | 0.0344     |
| Metabolic process                      | 132         | 2.0508     | 0.0330     |
| Cytosolic ribosome                     | 100         | 2.0253     | 0.0385     |
| ATPase activator activity              | 17          | 2.0213     | 0.0376     |

Abbreviations: NES, normalized enrichment score. FDR , false discovery rate .

Supplementary Table 5. Biological processes enriched in primary group.

| <b>Biological process</b>    | <b>Size</b> | <b>NES</b> | <b>FDR</b> |
|------------------------------|-------------|------------|------------|
| Jaeger metastasis            | 241         | -2.2788    | 0.0292     |
| Immortalized by HPV31        | 64          | -2.2767    | 0.0146     |
| Huper brast basal            | 53          | -2.2564    | 0.0139     |
| Module 438                   | 64          | -2.3025    | 0.0048     |
| Module 153                   | 34          | -2.2607    | 0.0055     |
| Module 297                   | 76          | -2.2392    | 0.0057     |
| Module 357                   | 76          | -2.2119    | 0.0062     |
| Module 154                   | 71          | -2.2010    | 0.0054     |
| Module 298                   | 25          | -2.1626    | 0.0103     |
| Cell differentiation         | 125         | -2.2650    | 0.0092     |
| Desmosome                    | 24          | -2.2592    | 0.0050     |
| Keratinocyte differentiation | 89          | -2.2454    | 0.0048     |
| Skin development             | 199         | -2.2181    | 0.0077     |
| Epidermis development        | 233         | -2.1883    | 0.0117     |
| Peptide cross linking        | 51          | -2.1565    | 0.0179     |
| Cell adherence unction       | 51          | -2.1209    | 0.0254     |
| KRAS lung                    | 133         | -1.9376    | 0.0184     |

Abbreviations: NES, normalized enrichment score. FDR, false discovery rate .

Supplementary Table 6. Fourteen genes with prognostic value in CEO melanoma patients..

| <b>Gene</b> | <b>HR</b> | <b>95% CI</b>  | <b>P value</b> |
|-------------|-----------|----------------|----------------|
| EREG        | 1.391     | 1.096 to 1.766 | 0.007          |
| GALNT8      | 1.408     | 1.098 to 1.804 | 0.007          |
| GPR87       | 1.314     | 1.086 to 1.591 | 0.005          |
| KIT         | 1.268     | 1.068 to 1.505 | 0.007          |
| KLF5        | 1.630     | 1.117 to 2.257 | 0.003          |
| SH3GL3      | 1.493     | 1.233 to 1.809 | <0.001         |
| PVRL1       | 1.612     | 1.192 to 2.178 | 0.002          |
| ATP1B1      | 0.749     | 0.607 to 0.923 | 0.007          |
| CDAN1       | 0.544     | 0.383 to 0.772 | 0.001          |
| DNAJB6      | 0.748     | 0.612 to 0.913 | 0.004          |
| EIF2AK4     | 0.772     | 0.640 to 0.930 | 0.006          |
| FAU         | 0.774     | 0.659 to 0.909 | 0.002          |
| GPX1        | 0.765     | 0.630 to 0.928 | 0.006          |
| TNFSF14     | 0.570     | 0.433 to 0.751 | <0.001         |

Abbreviations: GEO, Gene Expression Omnibus. HR, hazard ratio.

Supplementary Table 7. Comparison of clinicopathologic characteristics between high and low risk melanoma in TCGA database.

| Variable                | High risk               |      | Low risk                |      | p value |
|-------------------------|-------------------------|------|-------------------------|------|---------|
|                         | No. of Patients (n=230) | %    | No. of Patients (n=229) | %    |         |
| Age at diagnosis, years |                         |      |                         |      | 0.002   |
| Mean                    |                         | 55.7 |                         | 60.5 |         |
| SD                      |                         | 16.3 |                         | 15.2 |         |
| Sex                     |                         |      |                         |      | 0.565   |
| Male                    | 139                     | 60.4 | 145                     | 63.3 |         |
| Female                  | 91                      | 39.6 | 84                      | 36.7 |         |
| AJCC stage              |                         |      |                         |      | <0.001  |
| < III                   | 105                     | 44.7 | 144                     | 64.3 |         |
| III+IV                  | 130                     | 55.3 | 80                      | 35.7 |         |
| BRAF Mutation           |                         |      |                         |      | 0.572   |
| Mutation                | 103                     | 44.8 | 96                      | 41.9 |         |
| WT                      | 127                     | 55.2 | 133                     | 58.1 |         |
| NRAS Mutation           |                         |      |                         |      | 0.037   |
| Mutation                | 74                      | 32.2 | 53                      | 23.1 |         |
| WT                      | 156                     | 67.8 | 176                     | 76.9 |         |

Abbreviations: TCGA, The Cancer Genome Atlas. SD, Standard Deviation. AJCC, American Joint Committee on Cancer, 7th Edition. WT, wild-type.

Supplementary Table 8. Comparison of clinicopathologic characteristics between high and low risk melanoma in GEO database.

| Variable                | High risk              |      | Low risk               |      | p value |
|-------------------------|------------------------|------|------------------------|------|---------|
|                         | No. of Patients (n=61) | %    | No. of Patients (n=61) | %    |         |
| Age at diagnosis, years |                        |      |                        |      | 0.183   |
| Mean                    |                        | 68.7 |                        | 64.7 |         |
| SD                      |                        | 15.1 |                        | 16.0 |         |
| Sex                     |                        |      |                        |      | 1.000   |
| Male                    | 42                     | 68.9 | 41                     | 67.2 |         |
| Female                  | 19                     | 31.1 | 20                     | 32.8 |         |
| Clinical stage          |                        |      |                        |      | <0.001  |
| Primary                 | 28                     | 45.9 | 52                     | 85.2 |         |
| Metastatic              | 33                     | 54.1 | 9                      | 14.8 |         |
| BRAF Mutation           |                        |      |                        |      | 0.678   |
| Mutation                | 14                     | 21.6 | 17                     | 27.9 |         |
| WT                      | 47                     | 78.4 | 44                     | 72.1 |         |
| NRAS Mutation           |                        |      |                        |      | 0.008   |
| Mutation                | 7                      | 11.5 | 20                     | 32.8 |         |
| WT                      | 54                     | 88.5 | 41                     | 67.2 |         |

Abbreviations: GEO, Gene Expression Omnibus. SD, Standard Deviation. WT, wild-type.



Supplementary Table 9. Multivariate Cox regression analysis of clinicopathologic factors for overall survival in GEO database.

| Variable              | Univariate cox |         | Multivariate cox |         |
|-----------------------|----------------|---------|------------------|---------|
|                       | HR             | p Value | HR               | p Value |
| Age                   |                |         |                  |         |
| Increasing years      | 1.600          | 0.014   | 1.193            | 0.076   |
| Sex                   |                |         |                  |         |
| Female vs male        | 0.920          | 0.392   |                  |         |
| BRAF status           |                |         |                  |         |
| Mutation vs wild-type | 0.981          | 0.860   |                  |         |
| NRAS status           |                |         |                  |         |
| Mutation vs wild-type | 0.803          | 0.048   | 0.822            | 0.087   |
| Clinical stage        |                |         |                  |         |
| Metastatic vs primary | 2.183          | <0.001  | 1.516            | 0.031   |
| Local gene signature  |                |         |                  |         |
| High risk vs low risk | 1.721          | <0.001  | 1.570            | <0.001  |

Abbreviations: GEO, Gene Expression Omnibus. HR, hazard ratio.

## Supplementary Figure 1

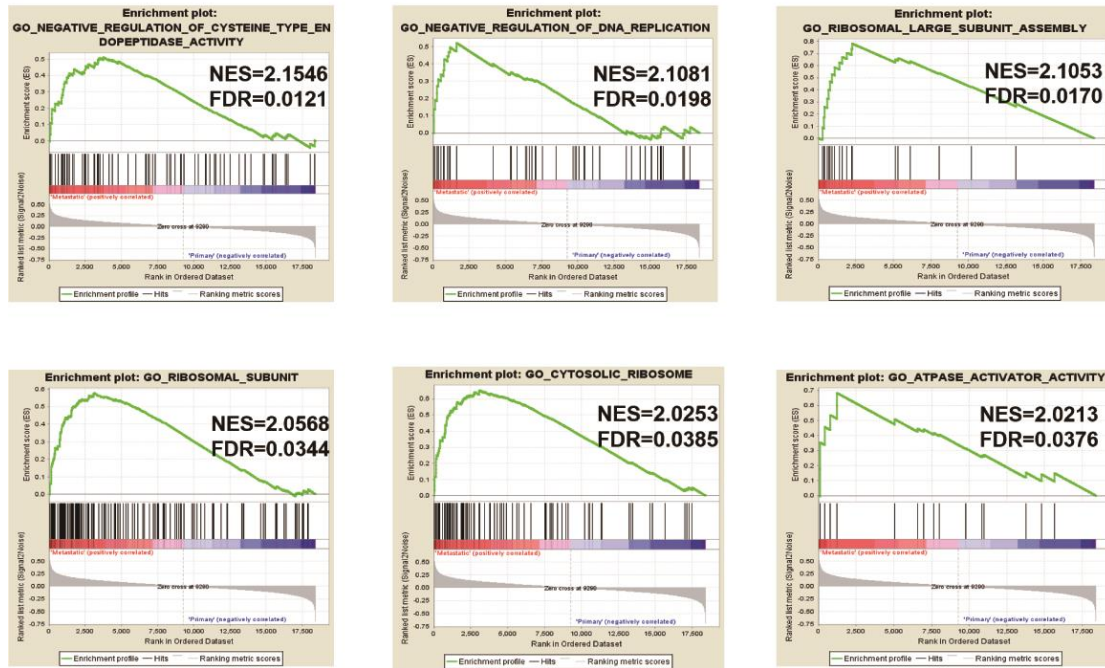

Gene set enrichment analysis (GSEA) for comparing genotype between metastatic and primary. FDR=false discovery rate; NES=normalized enrichment score.

## Supplementary Figure 2

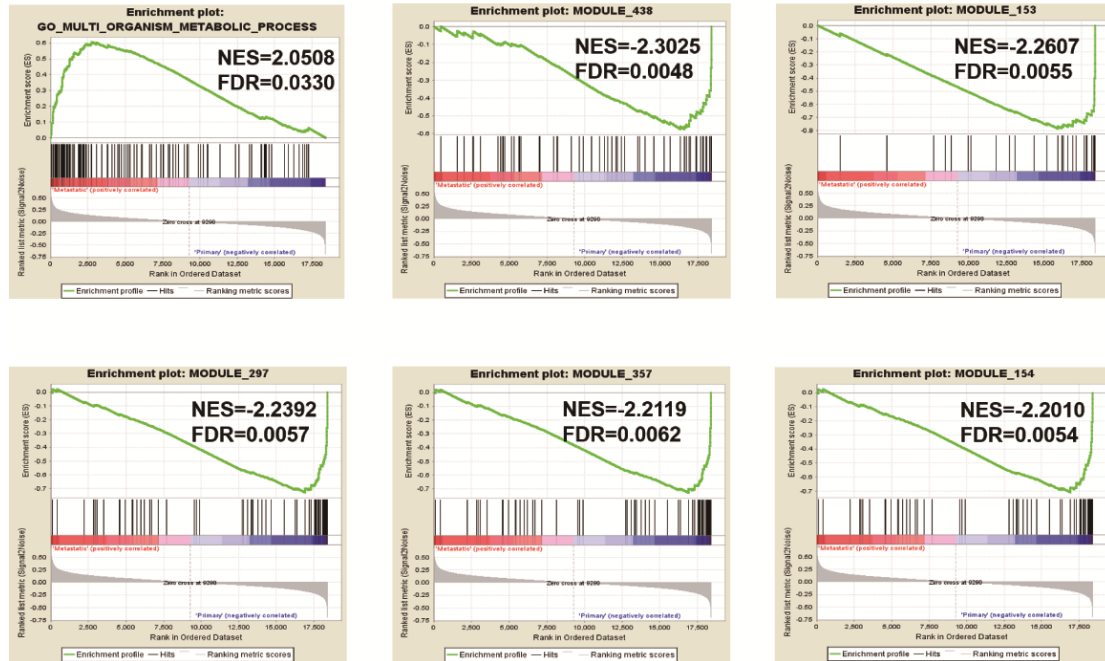

Gene set enrichment analysis (GSEA) for comparing genotype between metastatic and primary. FDR=false discovery rate; NES=normalized enrichment score.

### Supplementary Figure 3

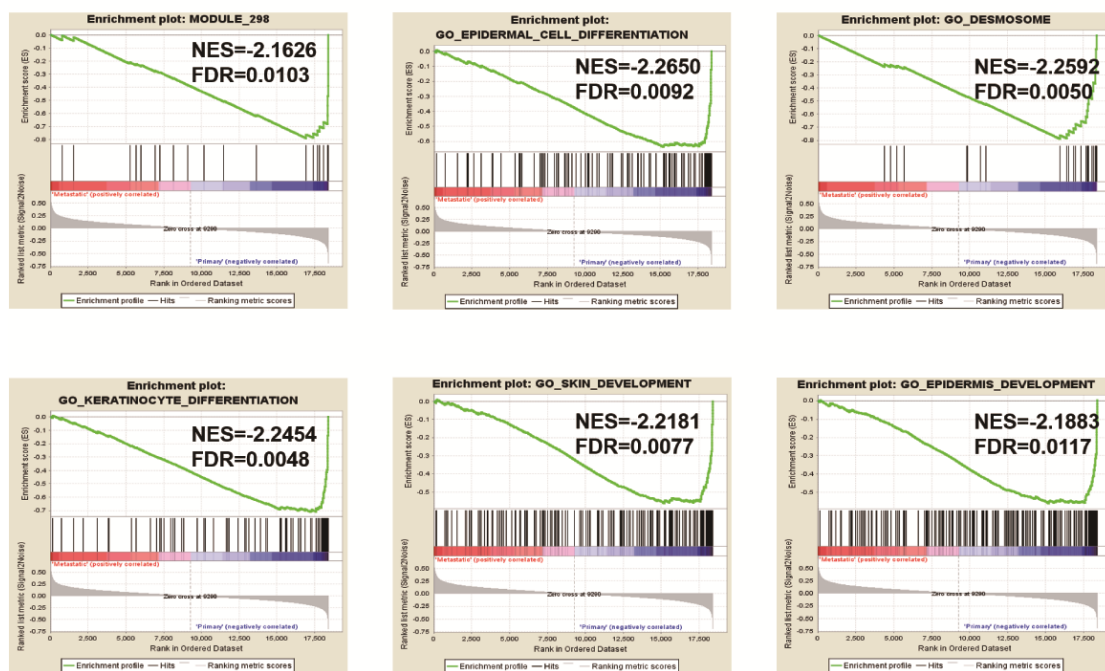

Gene set enrichment analysis (GSEA) for comparing genotype between metastatic and primary. FDR=false discovery rate; NES=normalized enrichment score.

## Supplementary Figure 4

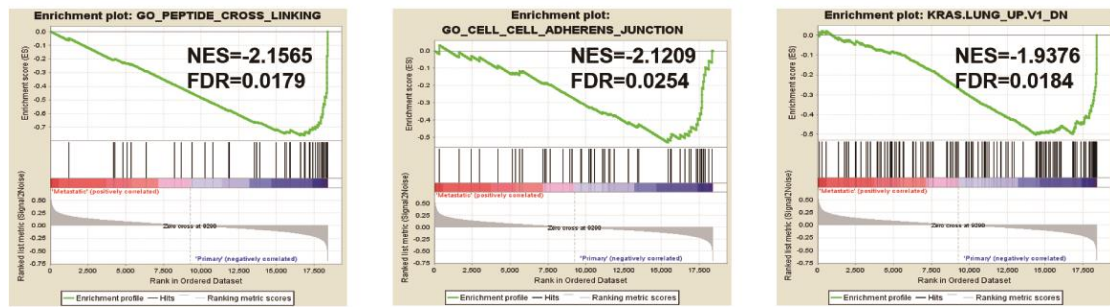

Gene set enrichment analysis (GSEA) for comparing genotype between metastatic and primary. FDR=false discovery rate; NES=normalized enrichment score.

## Supplementary Figure 5

a

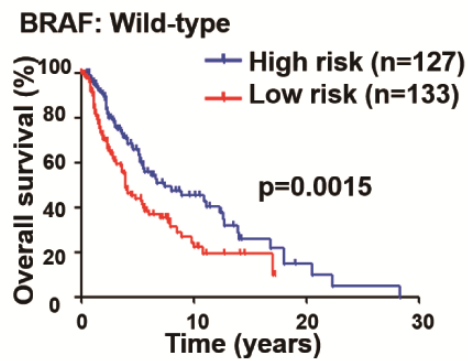

b

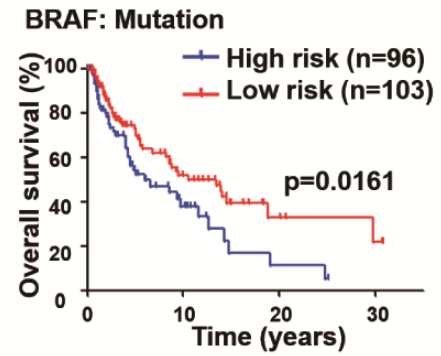

(a) Survival curves of overall survival for high and low risk groups classified by the local gene signature in BRAF wild-type melanoma patients (TCGA database). (b) Survival curves of overall survival for high and low risk groups classified by the local gene signature in BRAF mutation melanoma patients (TCGA database).
